# Supplementary material for: An HDAC8-selective fluorescent probe for imaging in living tumor cell lines and tissue slices
Source: Royal Society of Chemistry journal article supplement (doi:10.1039/d1ob01367j), 2021-01-01
Supplement: d1ob01367j1.pdf [file d1ob01367j1.pdf]

## Supplementary material

### An HDAC8-Selective Fluorescent Probe for Imaging in Living

#### Tumor Cell Lines and Tissue Slices

Yinyu Yan, Chaoqun Huang, Yi Shu, Hongmei Wen \*, Chenxiao Shan, Xinzhi Wang,  
Jian Liu, and Wei Li \*

*School of Pharmacy, Nanjing University of Chinese Medicine, Nanjing, 210023, PR  
China*

**\*Corresponding author details:** Hongmei Wen (✉); School of Pharmacy, Nanjing  
University of Chinese Medicine, Nanjing, 210023, China. E-mail:  
[wenhm@njucm.edu.cn](mailto:wenhm@njucm.edu.cn).

Wei Li (✉); School of Pharmacy, Nanjing University of Chinese Medicine, Nanjing,  
210023, China. E-mail: [liwaii@njucm.edu.cn](mailto:liwaii@njucm.edu.cn).

#### Contents

|                                                                                            |               |
|--------------------------------------------------------------------------------------------|---------------|
| Molecular Docking Analysis -----                                                           | Figure S1     |
| Fluorescence spectra of Probes -----                                                       | Figure S2     |
| HDAC enzymatic activity analysis-----                                                      | Figure S3     |
| HDAC8 mRNA expression (qRT-PCR) -----                                                      | Figure S4     |
| Confocal fluorescence imaging of NP-C6-PCI in MDA-MB-231-----                              | Figure S5-S6  |
| Cytotoxicity assay of the probe (NP-C6-PCI) -----                                          | Figure S7     |
| <sup>1</sup> H, <sup>13</sup> C NMR and HR-MS spectra of <b>Compounds</b> -----            | Figure S8-S27 |
| Antitumor activities of tested compounds on SH-SY5Y and MDA-MB-231 cells (Table<br>S1, S2) |               |

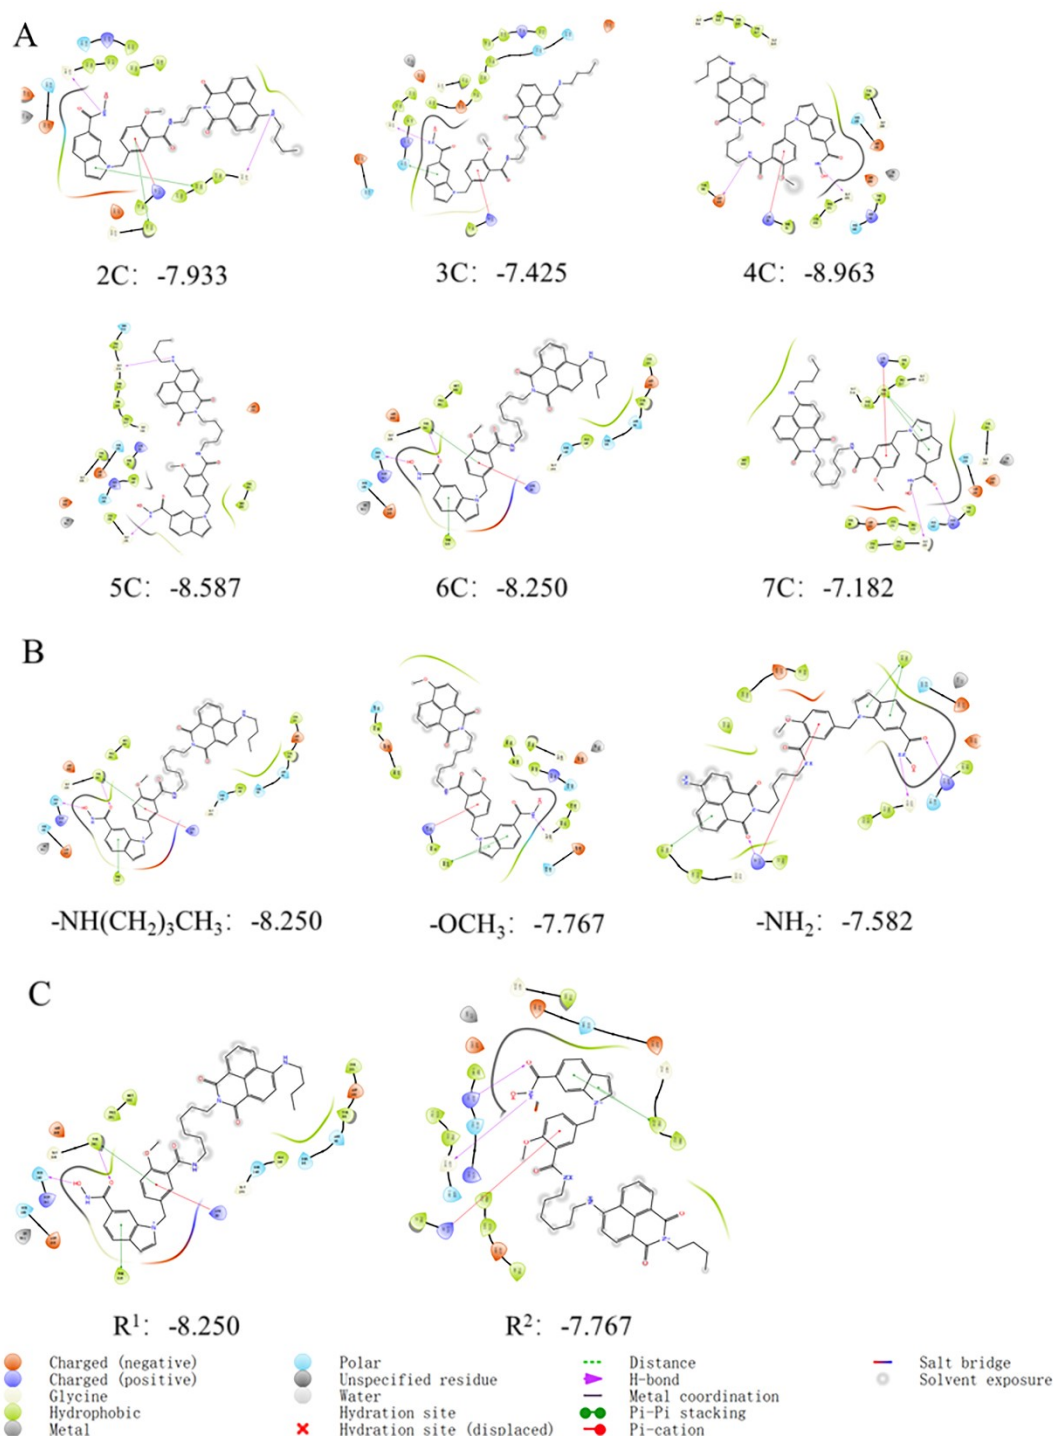

**Figure S1:** Molecular docking analysis of designed selective HDAC8 probes. (A) 2D docking diagrams of carbon chains of different lengths; (B) 2D docking diagrams of different naphthalene substituents; (C) 2D docking images of different splicing sites

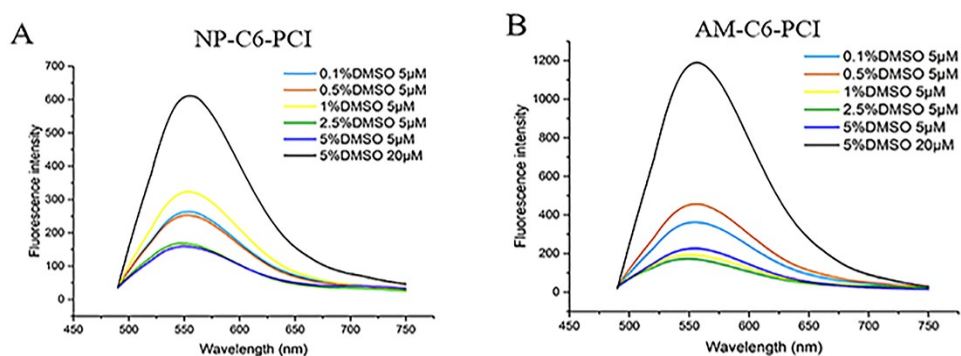

**Figure S2:** Fluorescence spectra of NP-C6-PCI (A) and AM-C6-PCI (B) in PBS solvent containing different proportions of DMSO ( $\lambda_{ex}=450\text{nm}$ ).

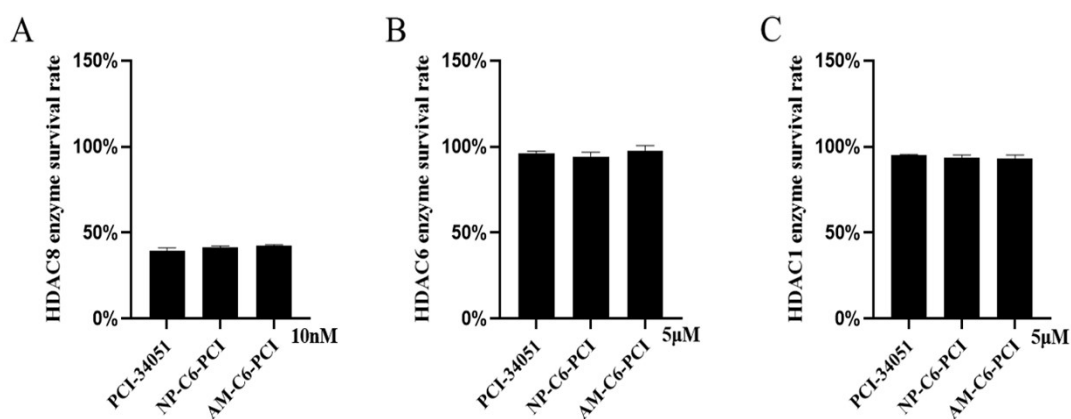

**Figure S3:** HDAC enzyme inhibitory activity assay. (A) Inhibitory activity of 10 nM tested compounds (PCI-34051, NP-C6-PCI and AM-C6-PCI) on HDAC8; (B) Inhibitor activity of 5  $\mu\text{M}$  compounds (PCI-34051, NP-C6-PCI and AM-C6-PCI) against HDAC6; (C) Inhibitor activity of 5  $\mu\text{M}$  compounds (PCI-34051, NP-C6-PCI and AM-C6-PCI) against HDAC1. The data was expressed as the mean  $\pm$  SD,  $n = 3$ .

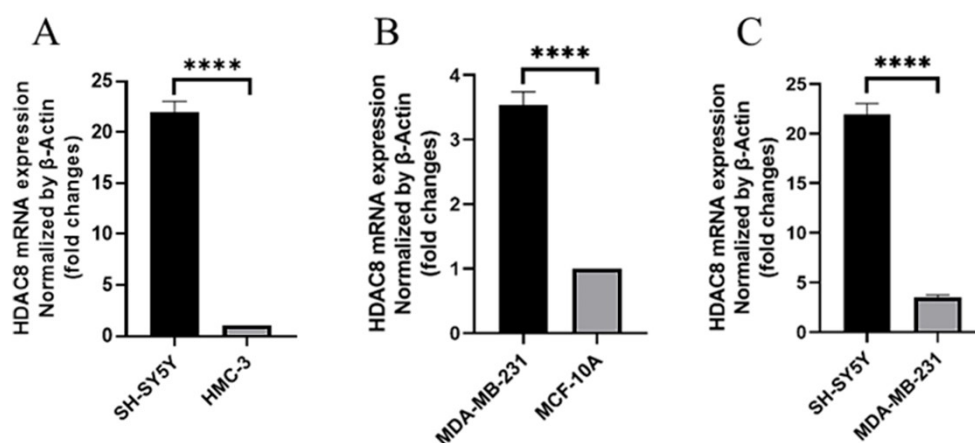

**Figure S4:** HDAC8 mRNA expression levels in cells. (A) HDAC8 mRNA expression in SH-SY5Y tumor cells and HMC-3 normal cells; (B) HDAC8 mRNA expression in MDA-MB-231 tumor cells and MCF-10A normal cells; (C) Comparison of HDAC8 mRNA expression between SH-SY5Y tumor cells and MDA-MB-231 tumor cells. The statistical difference of each cell was compared by analysis of variance,  $p < 0.05$  was regarded as a significant difference (\*\*\*\*  $P < 0.0001$ ), the data was expressed as the mean  $\pm$  SD,  $n = 3$ .

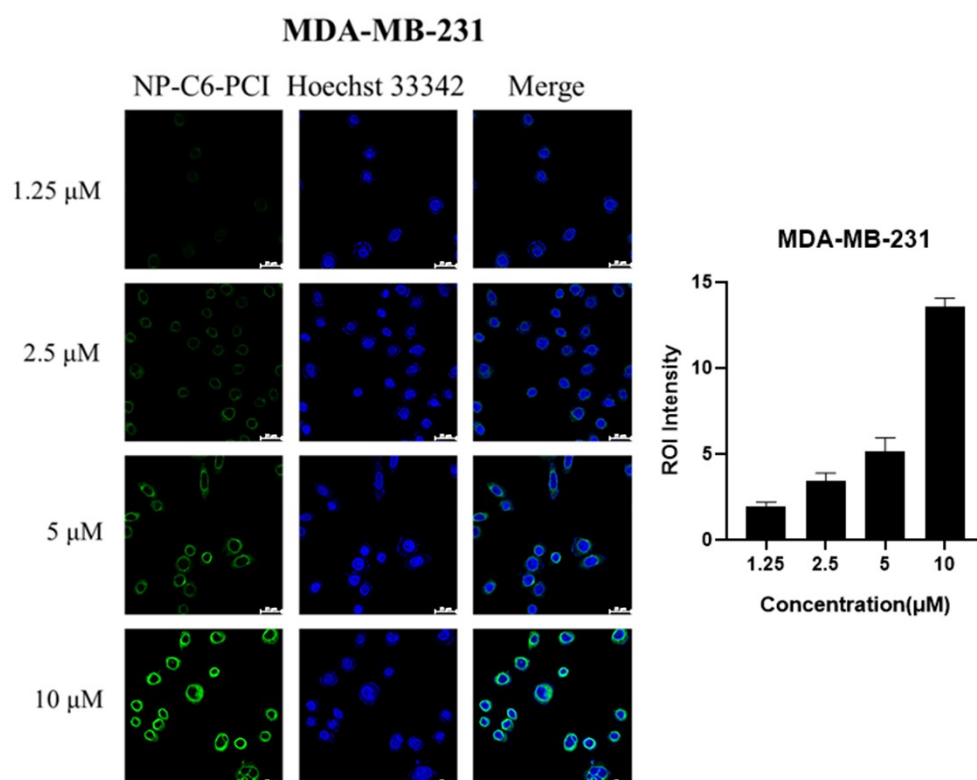

**Figure S5:** Fluorescence imaging of MDA-MB-231 cells at different uptake concentrations. NP-C6-PCI (green channel:  $\lambda_{ex} = 458$  nm,  $\lambda_{em} = 500-550$  nm). Hoechst 33342 (blue channel:  $\lambda_{ex} = 405$  nm,  $\lambda_{em} = 461$  nm). Data are expressed as the mean SD of determinations in triplicate from at least three distinct experiments (The data was expressed as the mean  $\pm$  SD,  $n = 3$ ), the scale bar represents 25  $\mu$ m.

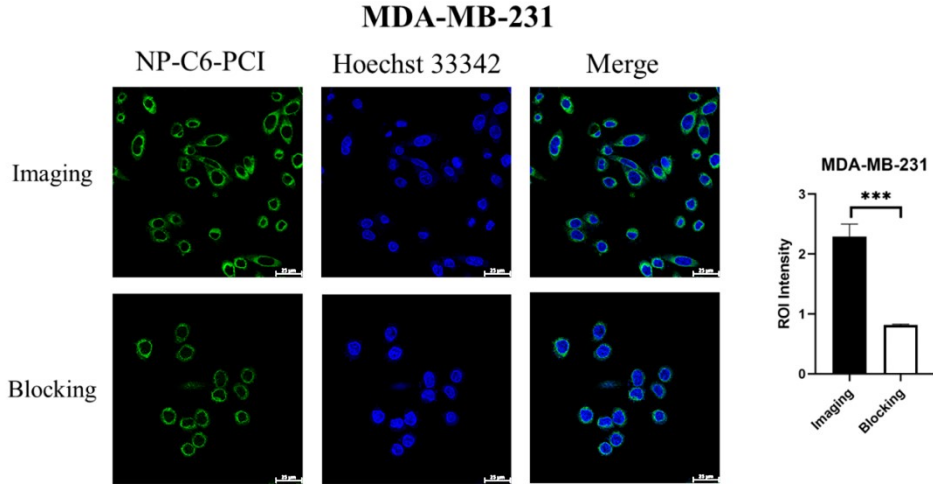

**Figure S6:** MDA-MB-231 cells incubated with NP-C6-PCI at 5 $\mu$ M (Imaging), NP-C6-PCI at 5 $\mu$ M in the presence of 100-fold excess PCI-34051 (Blocking). NP-C6-PCI (green channel:  $\lambda_{ex}$  = 458 nm,  $\lambda_{em}$  = 500-550 nm). Hoechst 33342 (blue channel:  $\lambda_{ex}$  = 405 nm,  $\lambda_{em}$  = 461 nm). Data are expressed as the mean SD of determinations in triplicate from at least three distinct experiments (Analysis of variance \*\*\* P < 0.001, the data was expressed as the mean  $\pm$  SD, n = 3.), the scale bar represents 25  $\mu$ m.

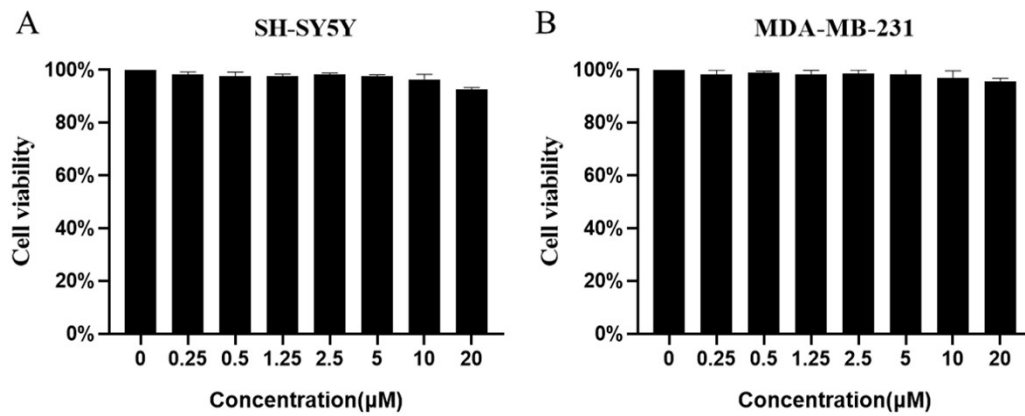

**Figure S7 :** Cell viability after incubation of PCI-34051 and NP-C6-PCI at different concentrations with SH-SY5Y(A) and MDA-MB-231(B) by MTT assay at 37°C for 12 h (each sample was tested using three replicates, and the results are reported as the mean standard deviation); The data was expressed as the mean  $\pm$  SD, n = 3.

### HR-MS spectrum of Compounds

Spectrum from NEG-YYY-1-15.wiff (sample 1) - YYY-1-15, Experiment 1, -TOF MS (10 - 2600) from 0.067 min

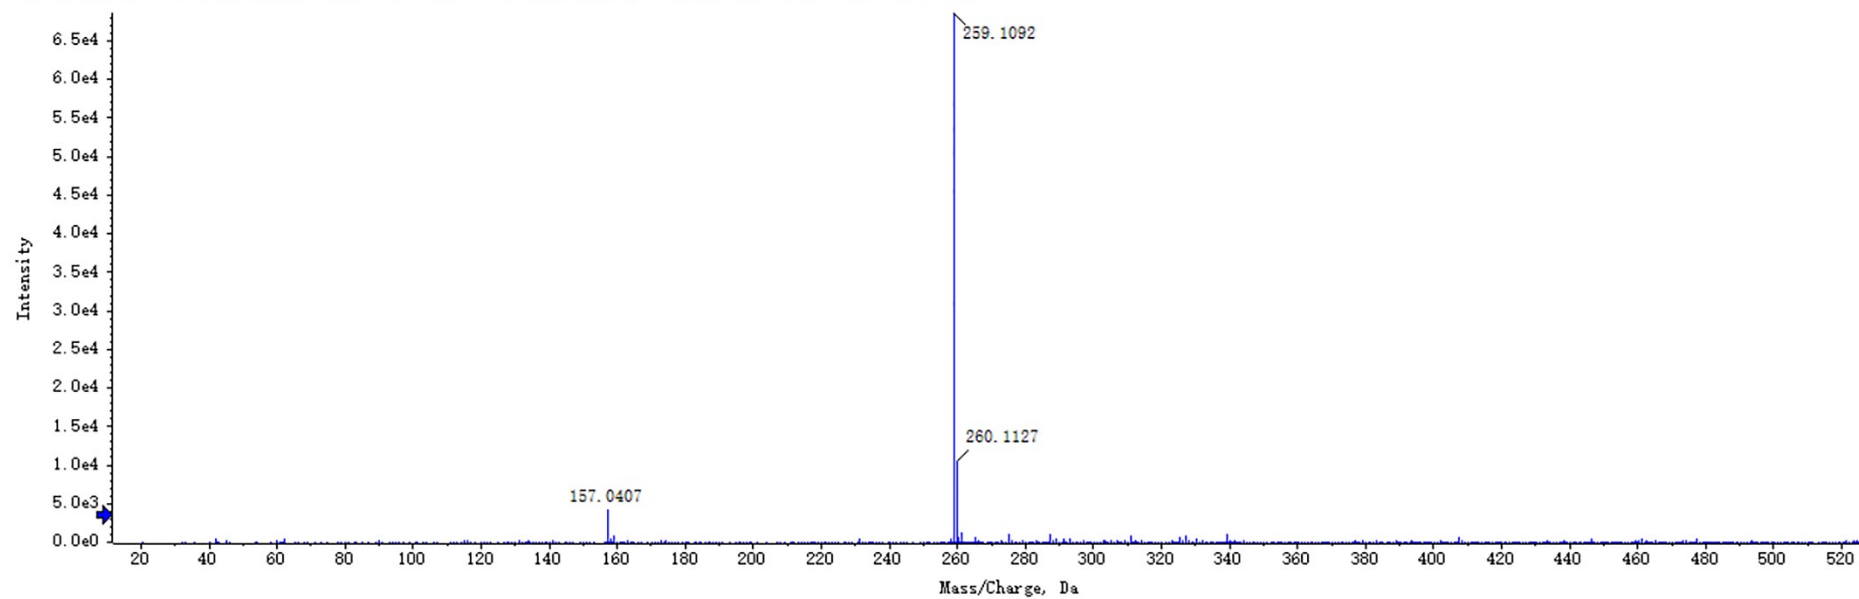

**Figure S8 : HR-MS spectrum of Compound 3**

Spectrum from NEG-YYY-1-30.wiff (sample 1) - YYY-1-30, Experiment 1, -TOF MS (10 - 2600) from 0.061 min

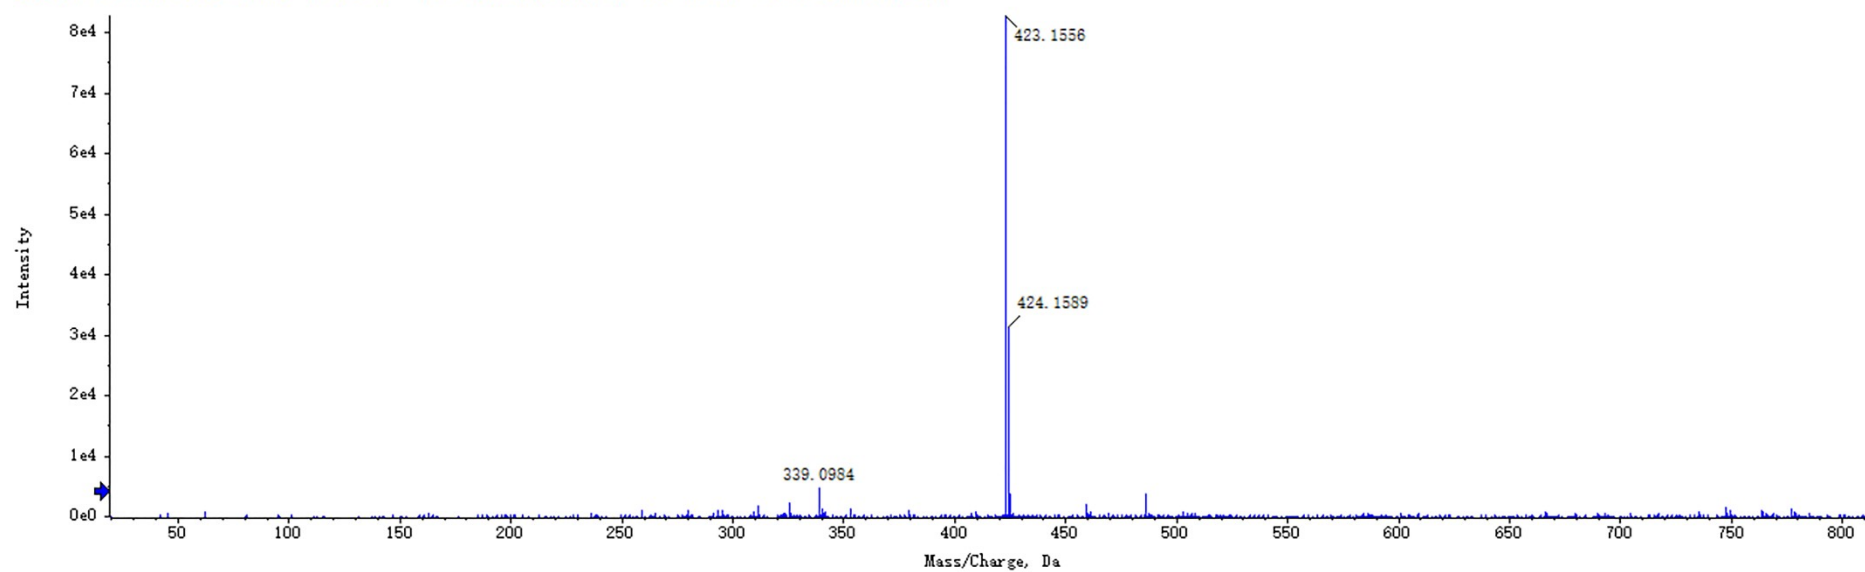

**Figure S9 : HR-MS spectrum of Compound 6**

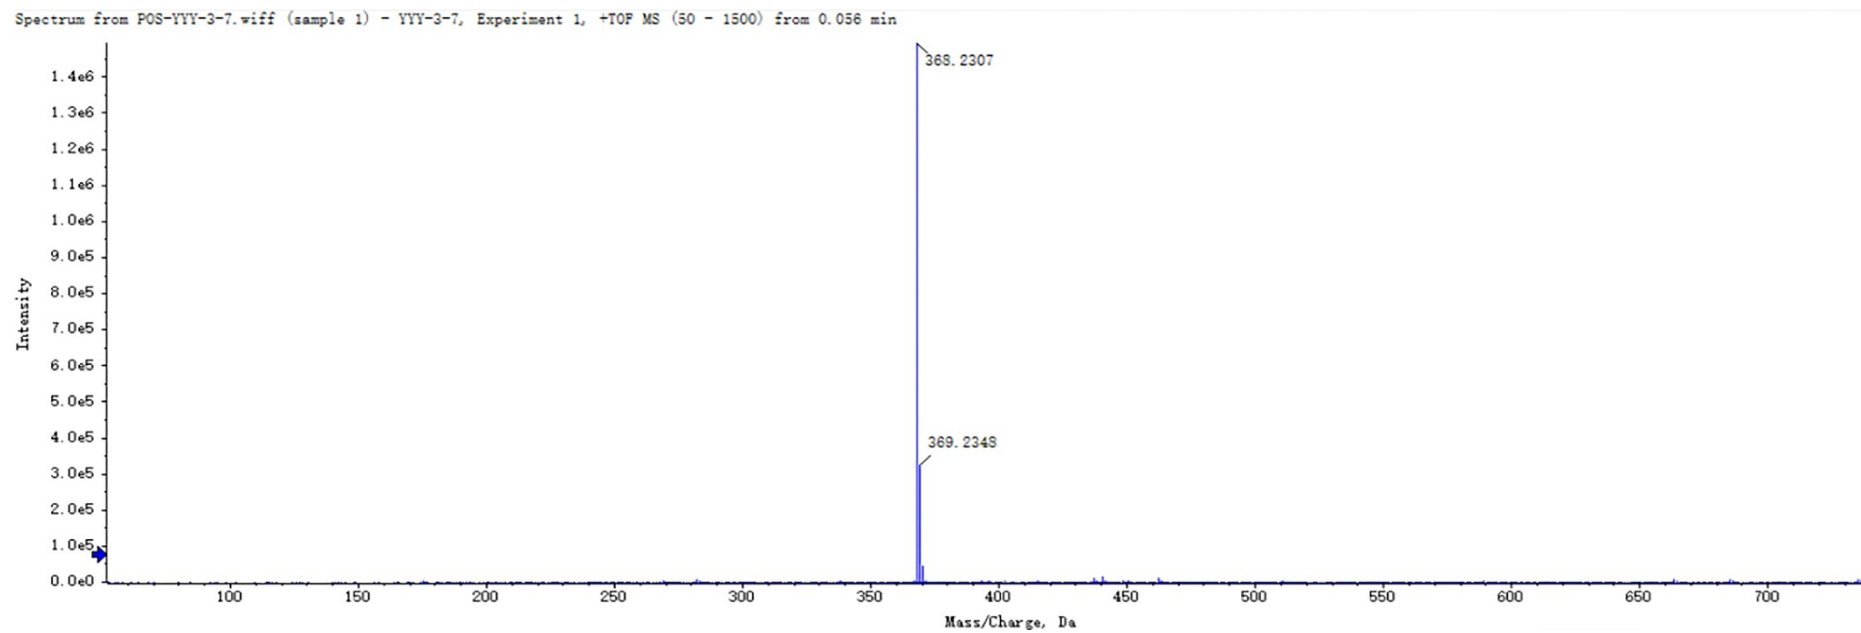

**Figure S10 : HR-MS spectrum of Compound 9**

Spectrum from DataSET2.wiff (sample 1) - yyy-3-33, Experiment 1, +TOF MS (50 - 1200) from 0.064 min

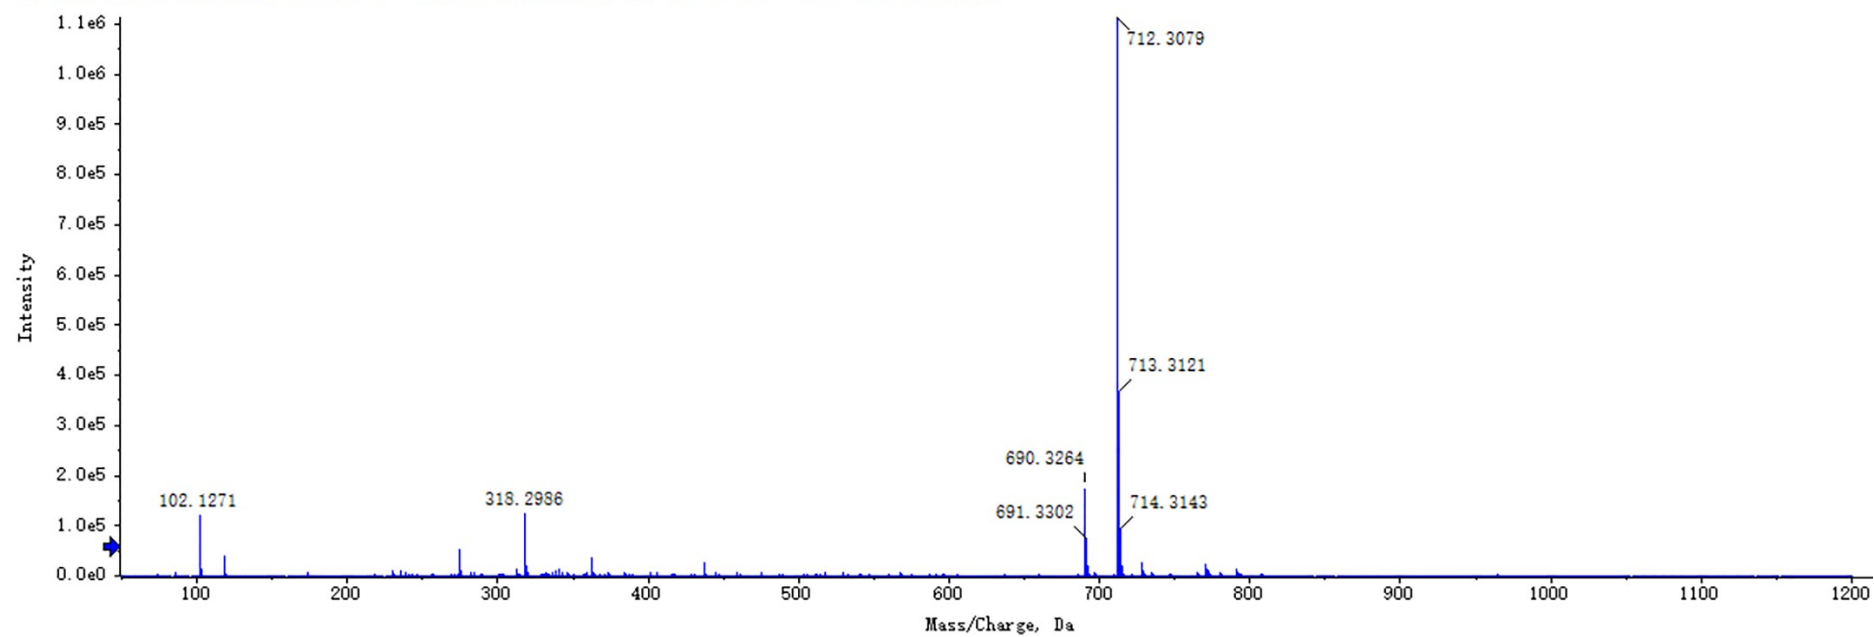

**Figure S11 : HR-MS spectrum of Compound 10 (NP-C6-PCI)**

Spectrum from DataSET1.wiff (sample 1) - yyy2-35, Experiment 1, +TOF MS (50 - 1200) from 0.066 min

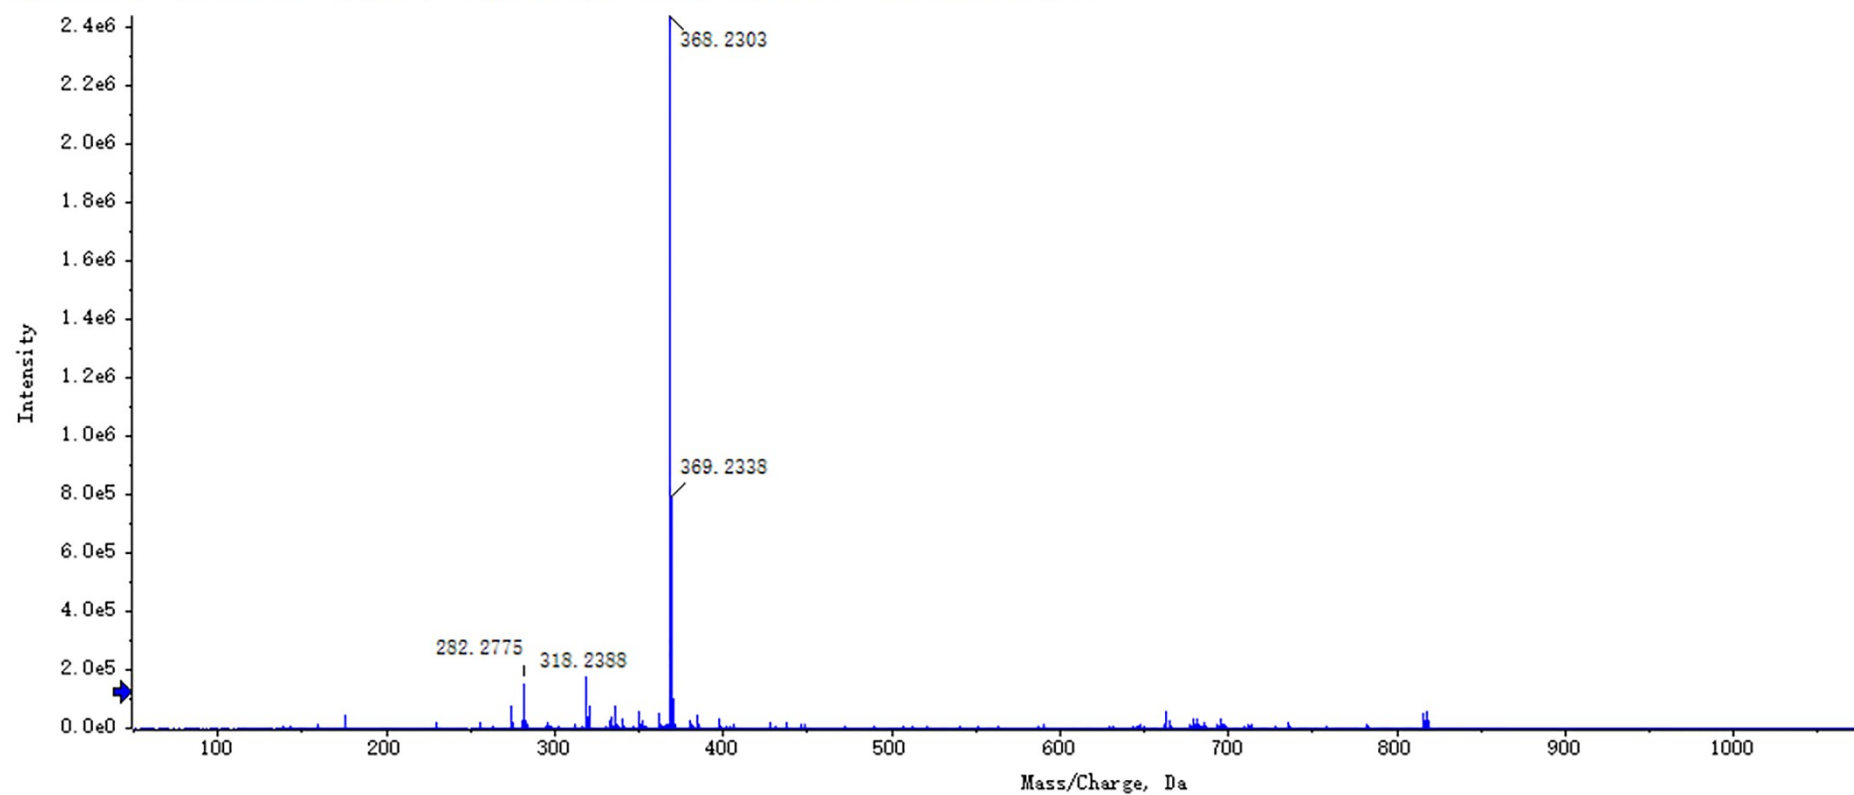

Figure S12 : HR-MS spectrum of Compound 12

Spectrum from POS-YYY-3-30.wiff (sample 1) - YYY-3-30, Experiment 1, +TOF MS (50 - 1500) from 0.062 min

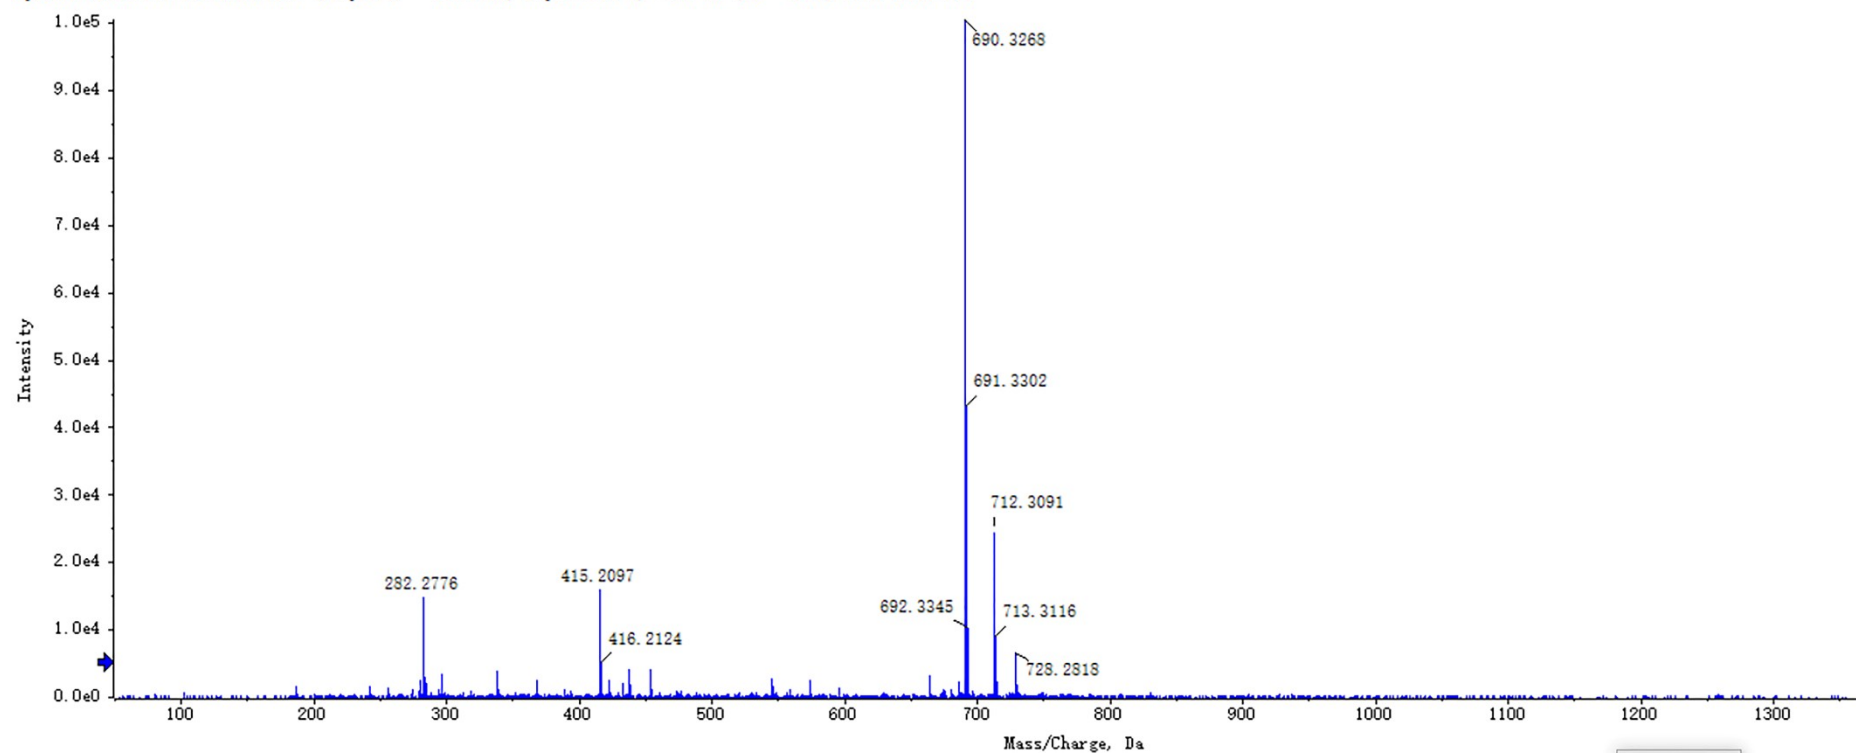

**Figure S13 : HR-MS spectrum of Compound 13 (AM-C6-PCI)**

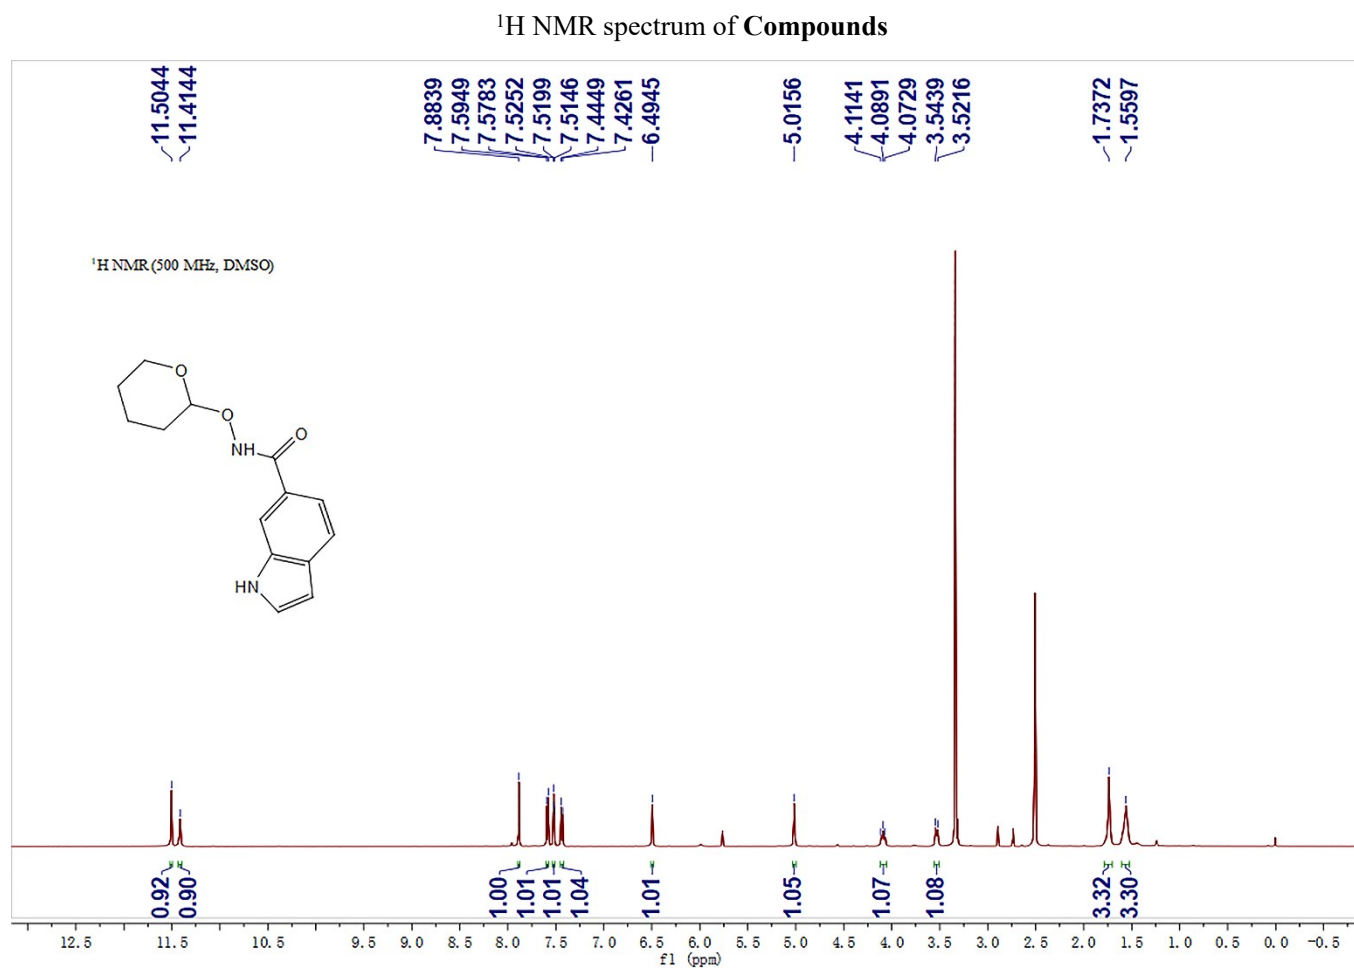

**Figure S14 :** <sup>1</sup>H NMR spectrum of **Compound 3** (500 MHz, DMSO-*d*<sub>6</sub>)

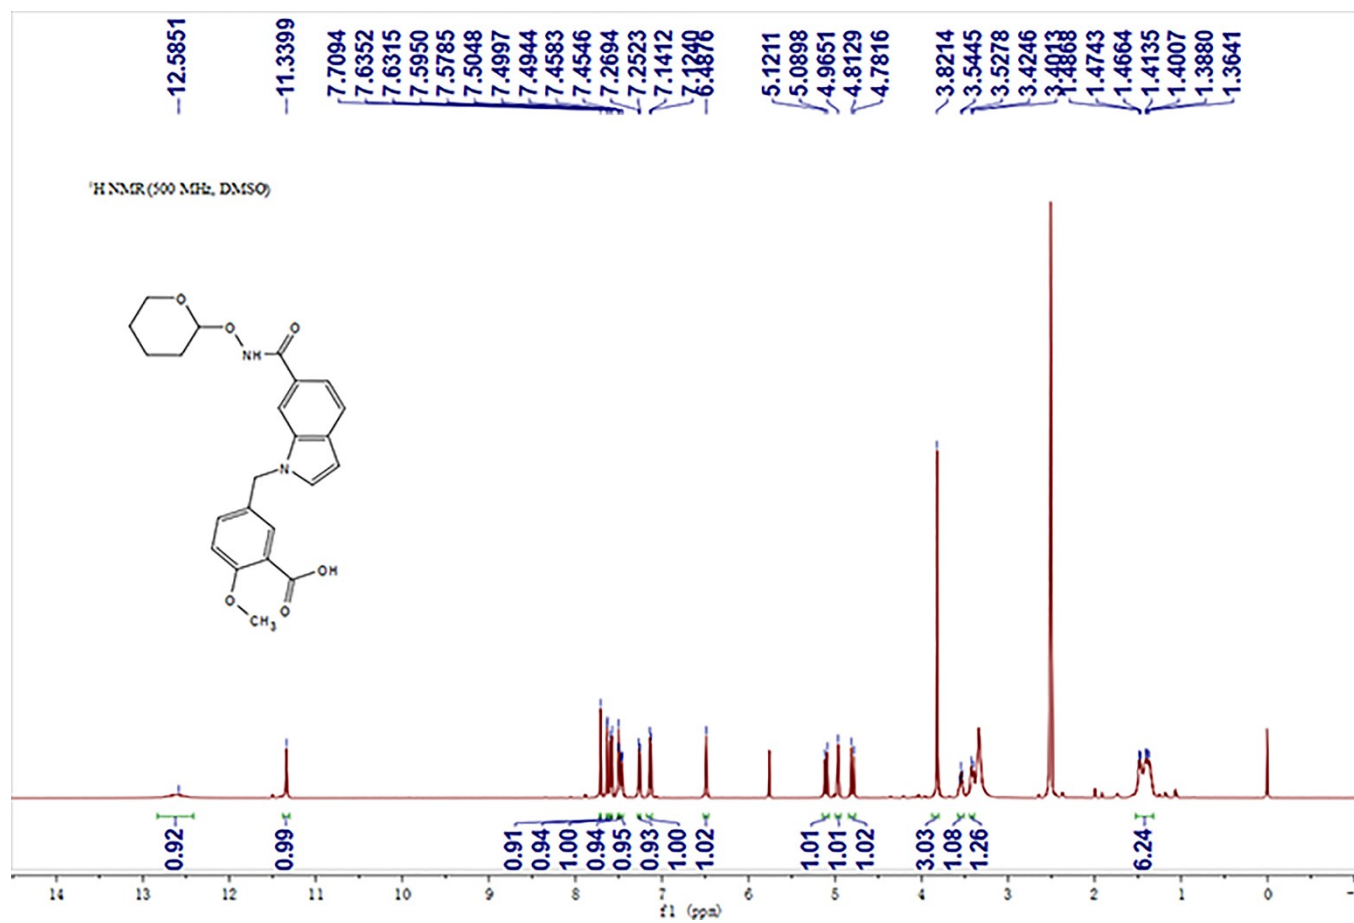

Figure S15 : <sup>1</sup>H NMR spectrum of Compound 6 (500 MHz, DMSO-*d*<sub>6</sub>)

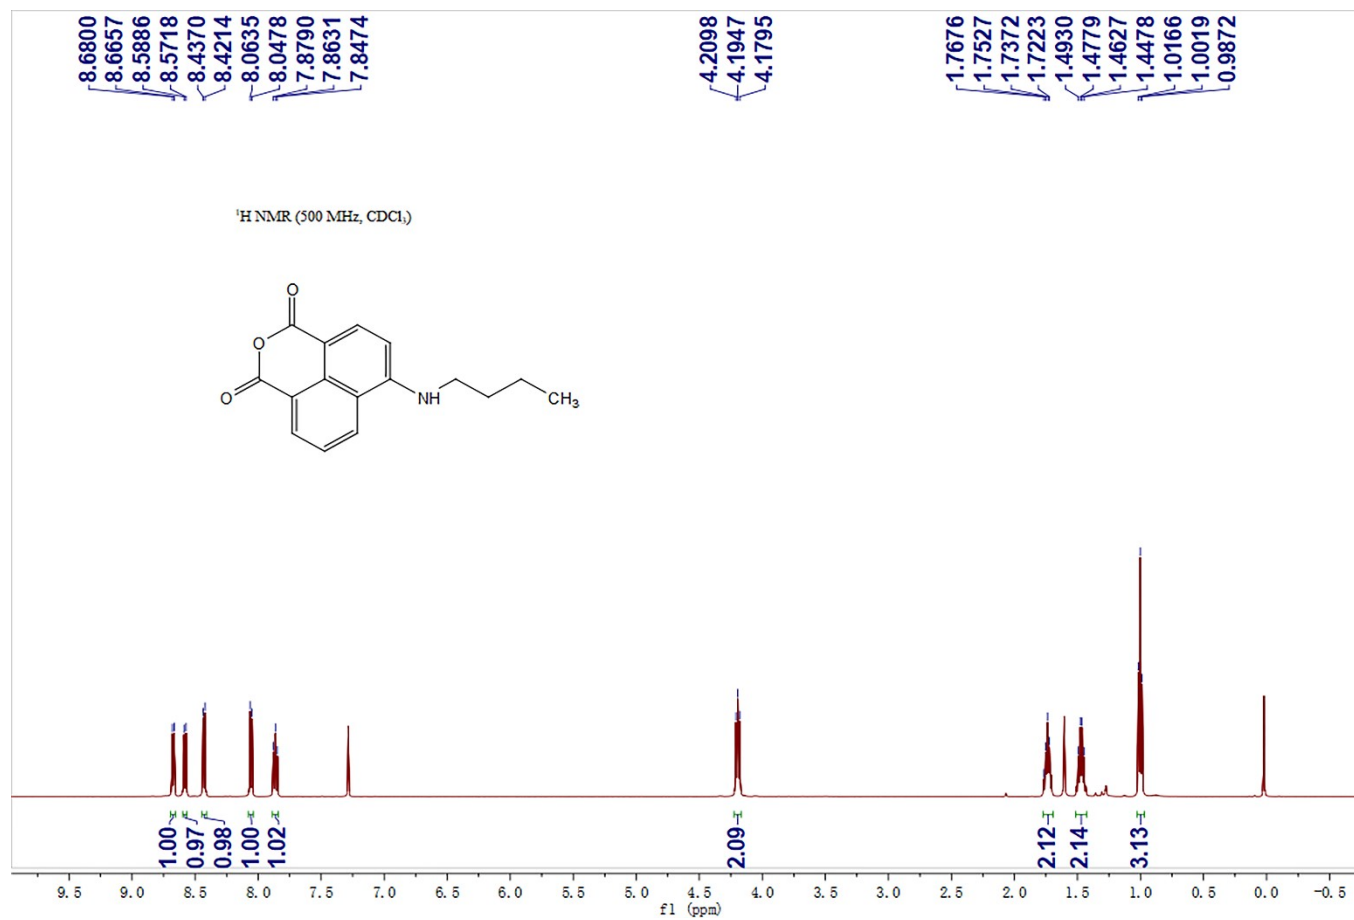

Figure S16 : <sup>1</sup>H NMR spectrum of Compound 8 (500 MHz, CDCl<sub>3</sub>)

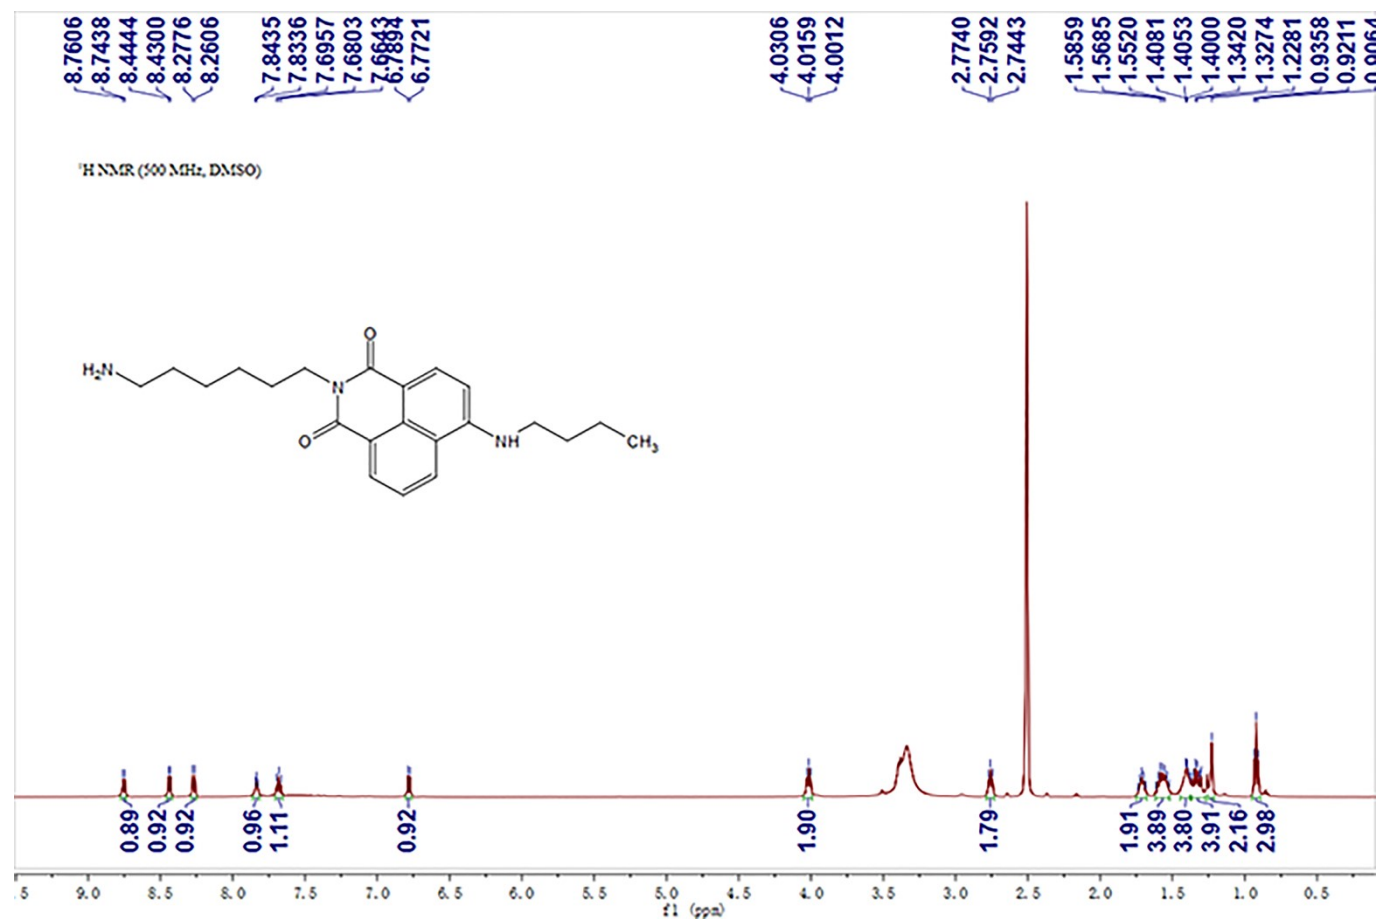

Figure S17 : <sup>1</sup>H NMR spectrum of Compound 9 (500 MHz, DMSO-*d*<sub>6</sub>)

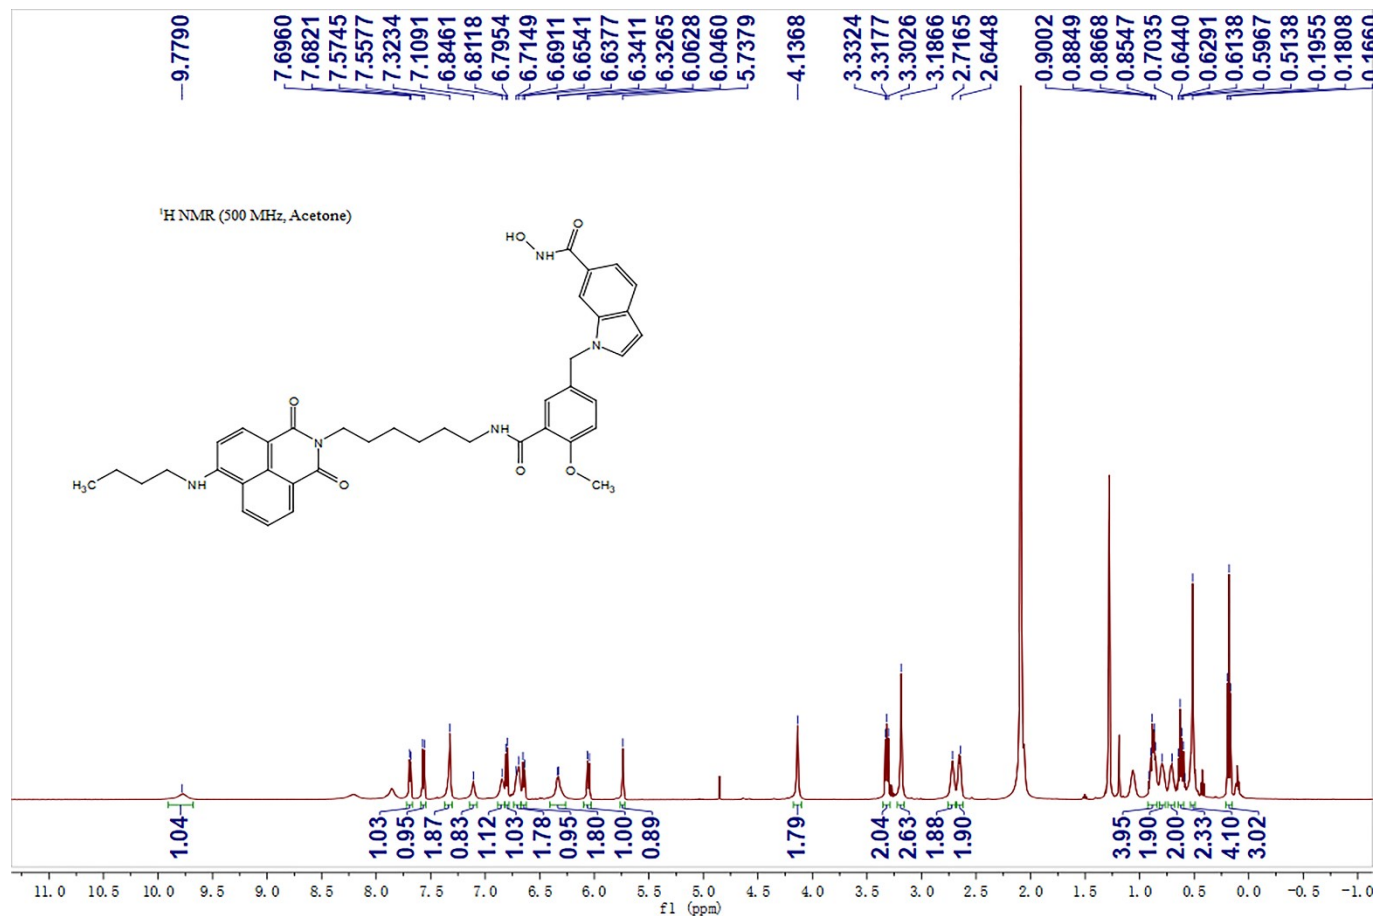

Figure S18 : <sup>1</sup>H NMR spectrum of Compound 10 (NP-C6-PCI) (500 MHz, Acetone-*d*<sub>6</sub>)

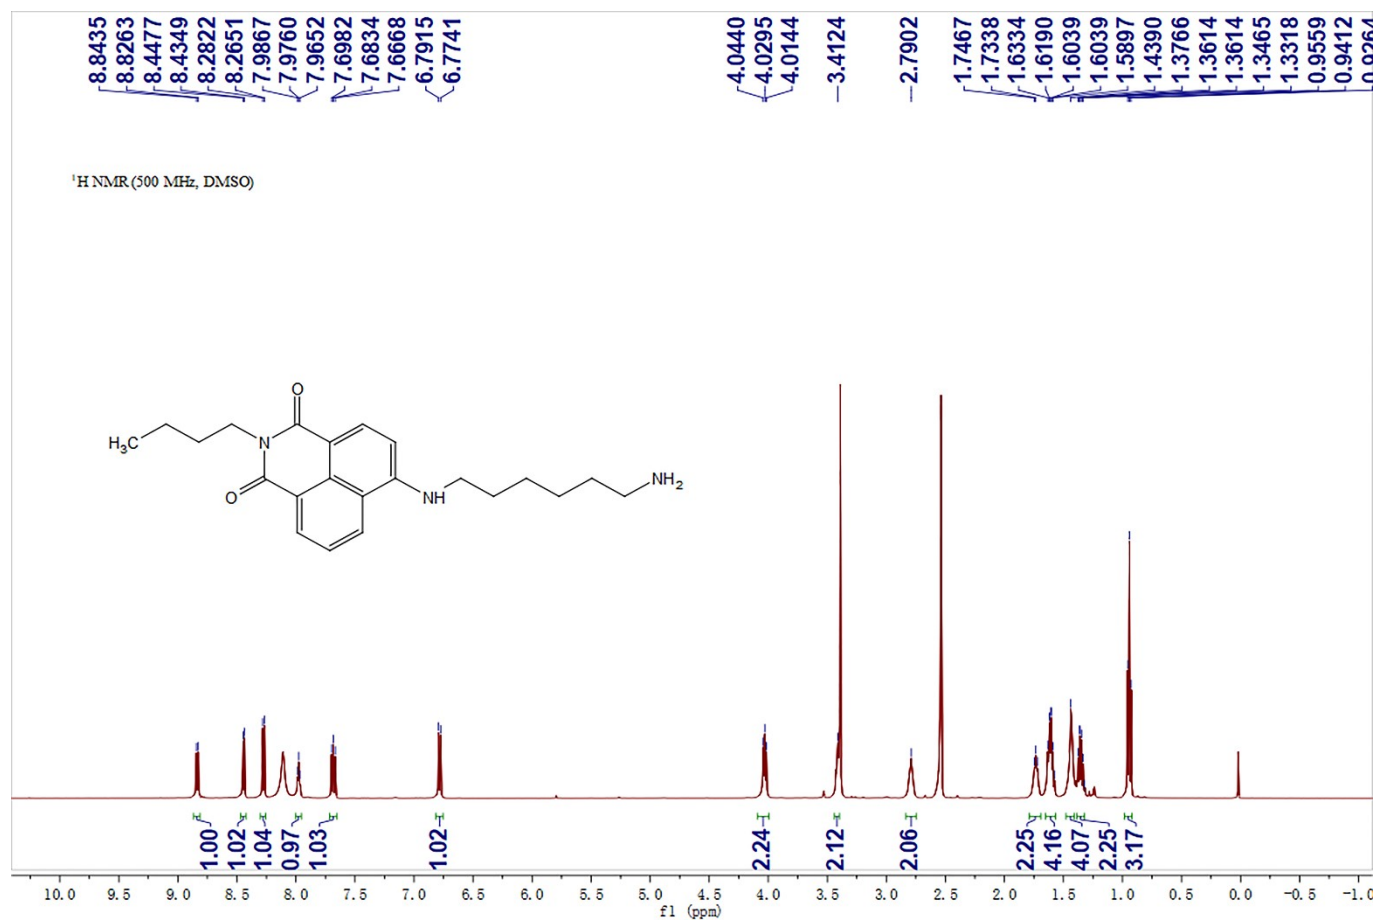

Figure S19 : <sup>1</sup>H NMR spectrum of Compound 12 (500 MHz, DMSO-*d*<sub>6</sub>)

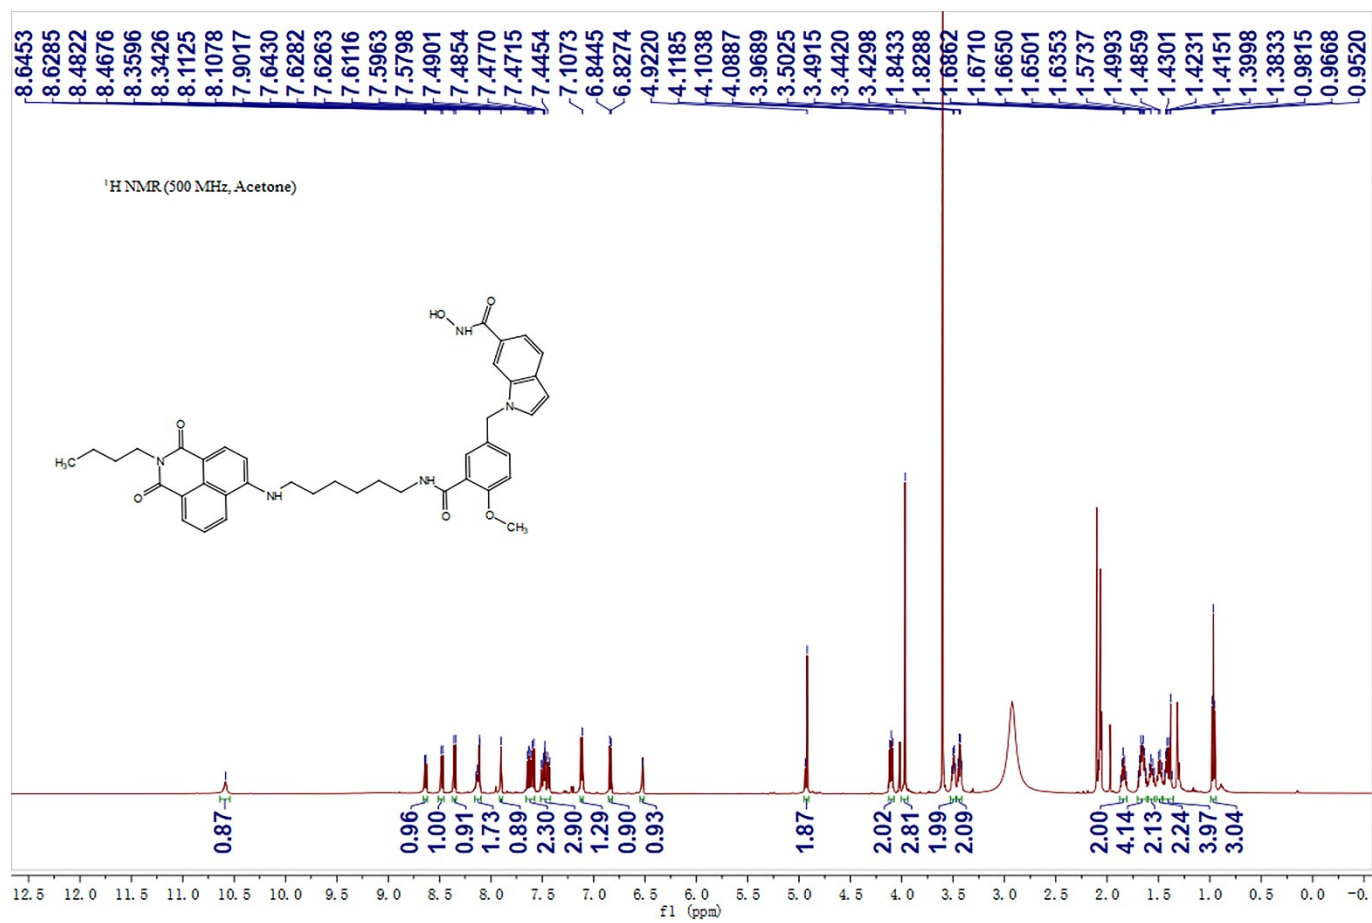

Figure S20 : <sup>1</sup>H NMR spectrum of Compound 13 (AM-C6-PCI) (500 MHz, Acetone-*d*<sub>6</sub>)

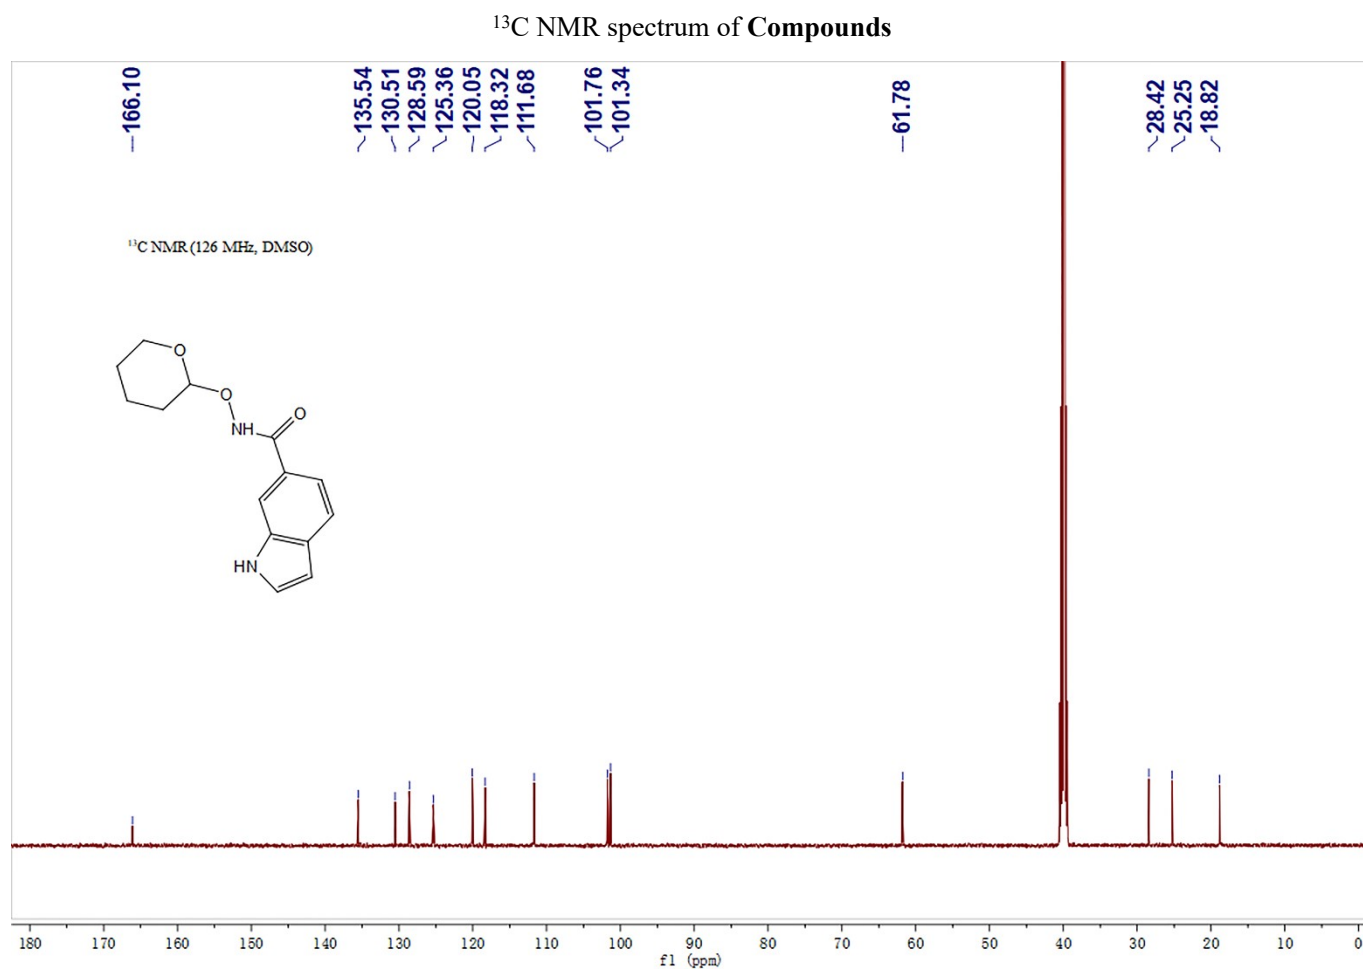

**Figure S21 :** <sup>13</sup>C NMR spectrum of **compound 3** (126 MHz, DMSO-*d*<sub>6</sub>)

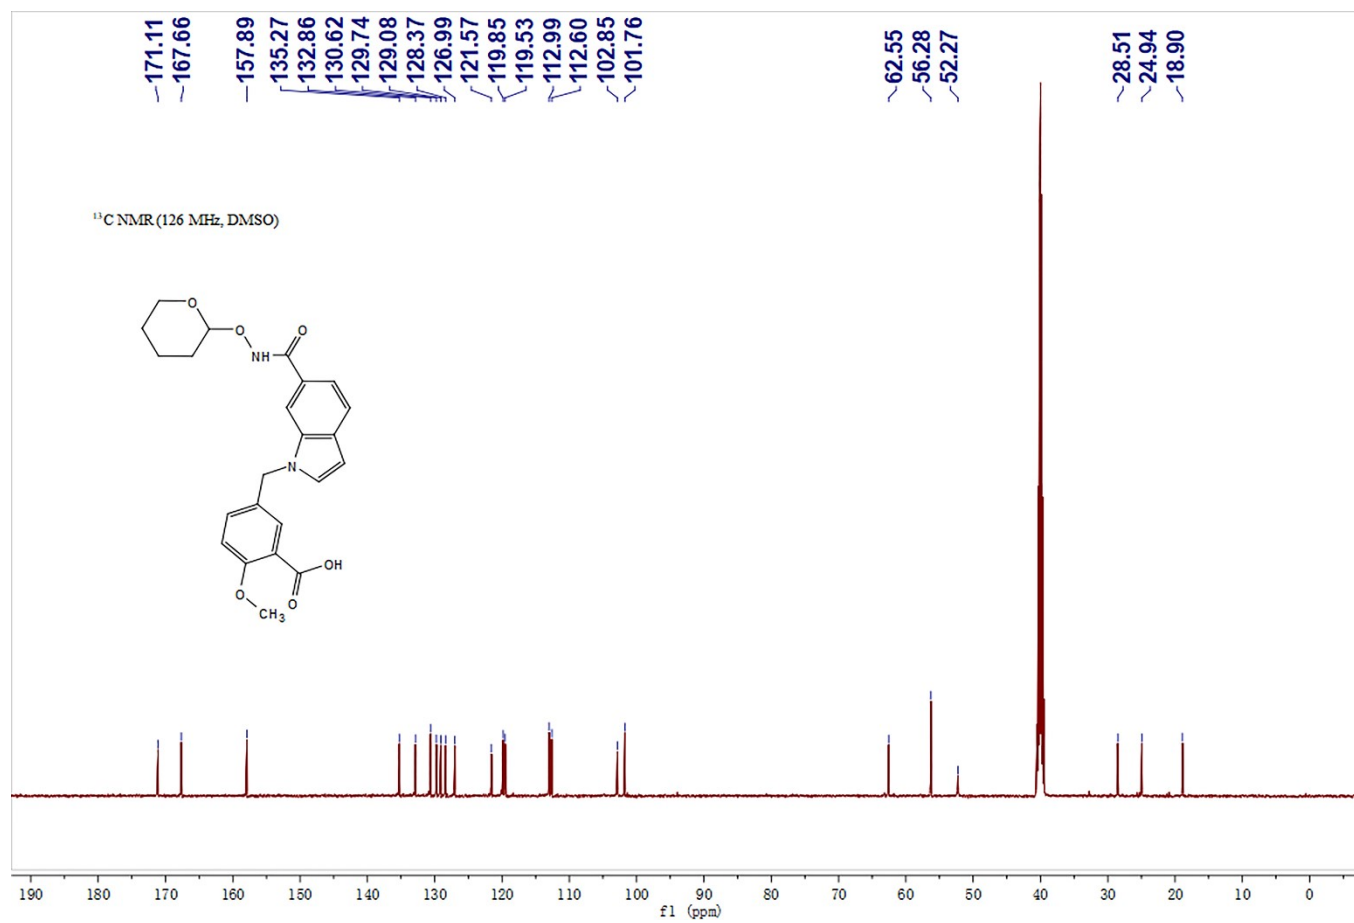

**Figure S22 :** <sup>13</sup>C NMR spectrum of **compound 6** (126 MHz, DMSO-*d*<sub>6</sub>)

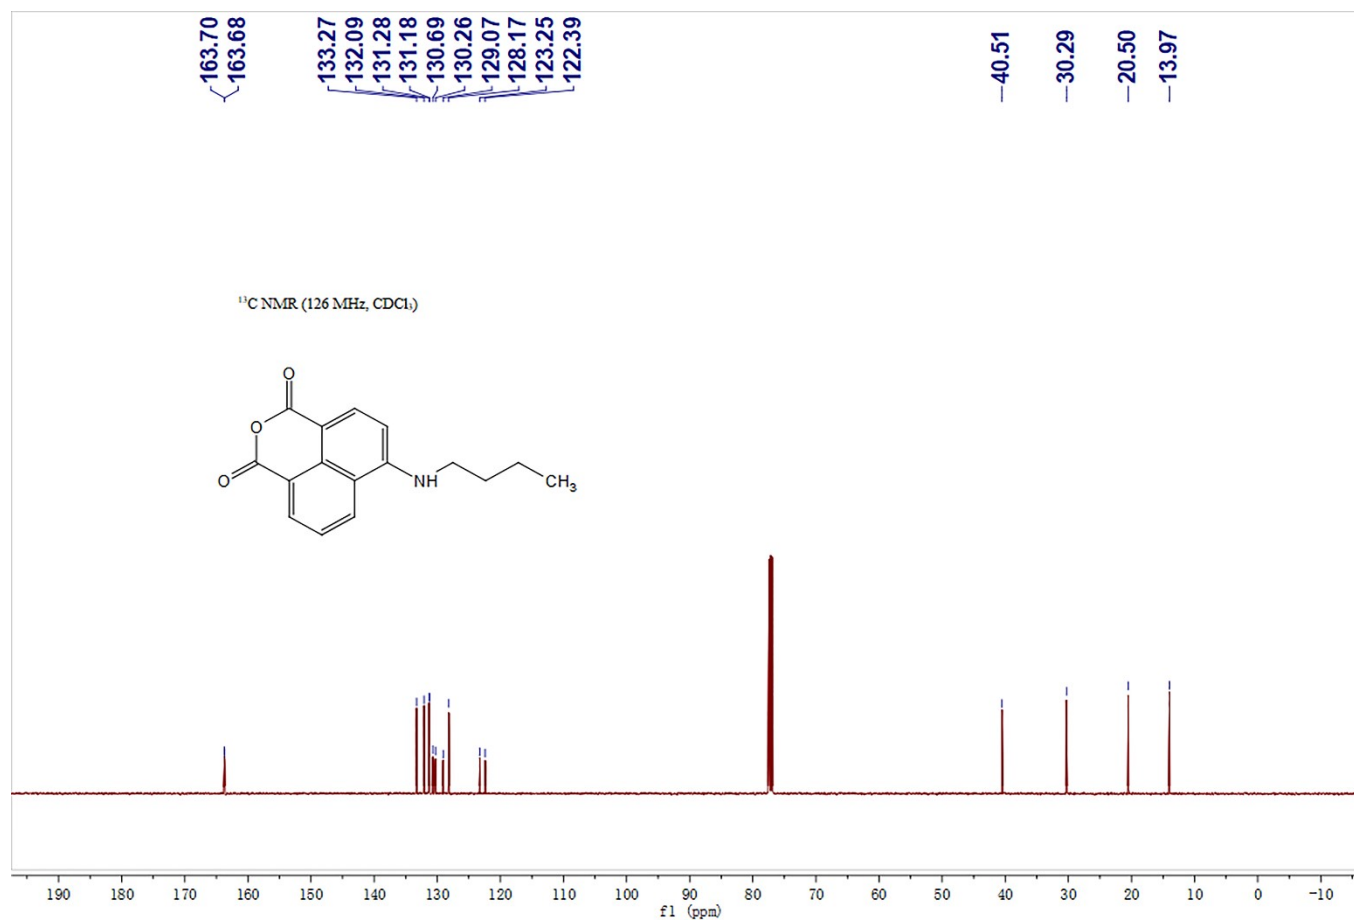

**Figure S23 :** <sup>13</sup>C NMR spectrum of **Compound 8** (500 MHz, CDCl<sub>3</sub>)

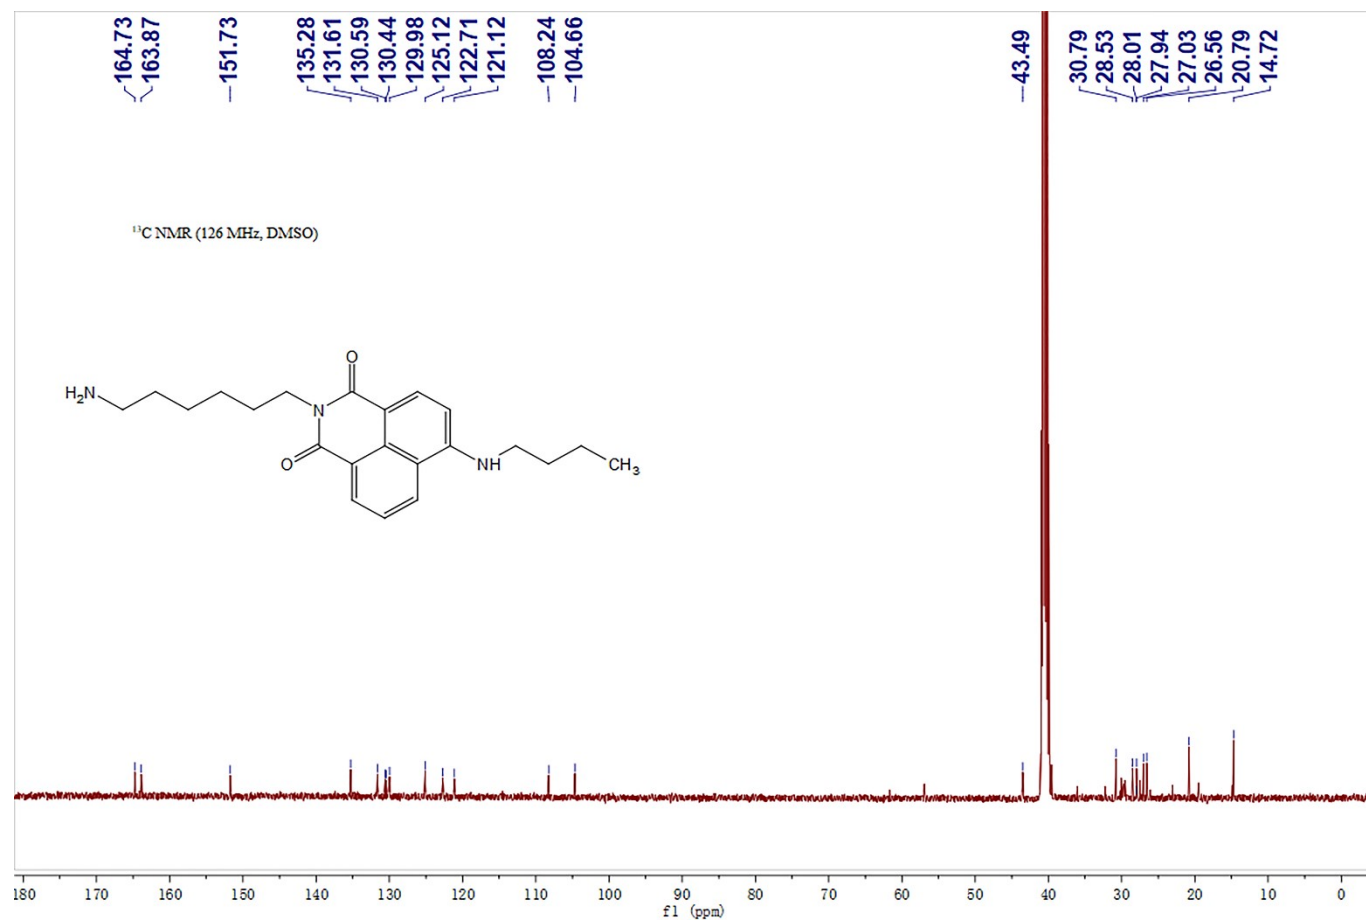

**Figure S24 :** <sup>13</sup>C NMR spectrum of **compound 9** (126 MHz, DMSO-*d*<sub>6</sub>)

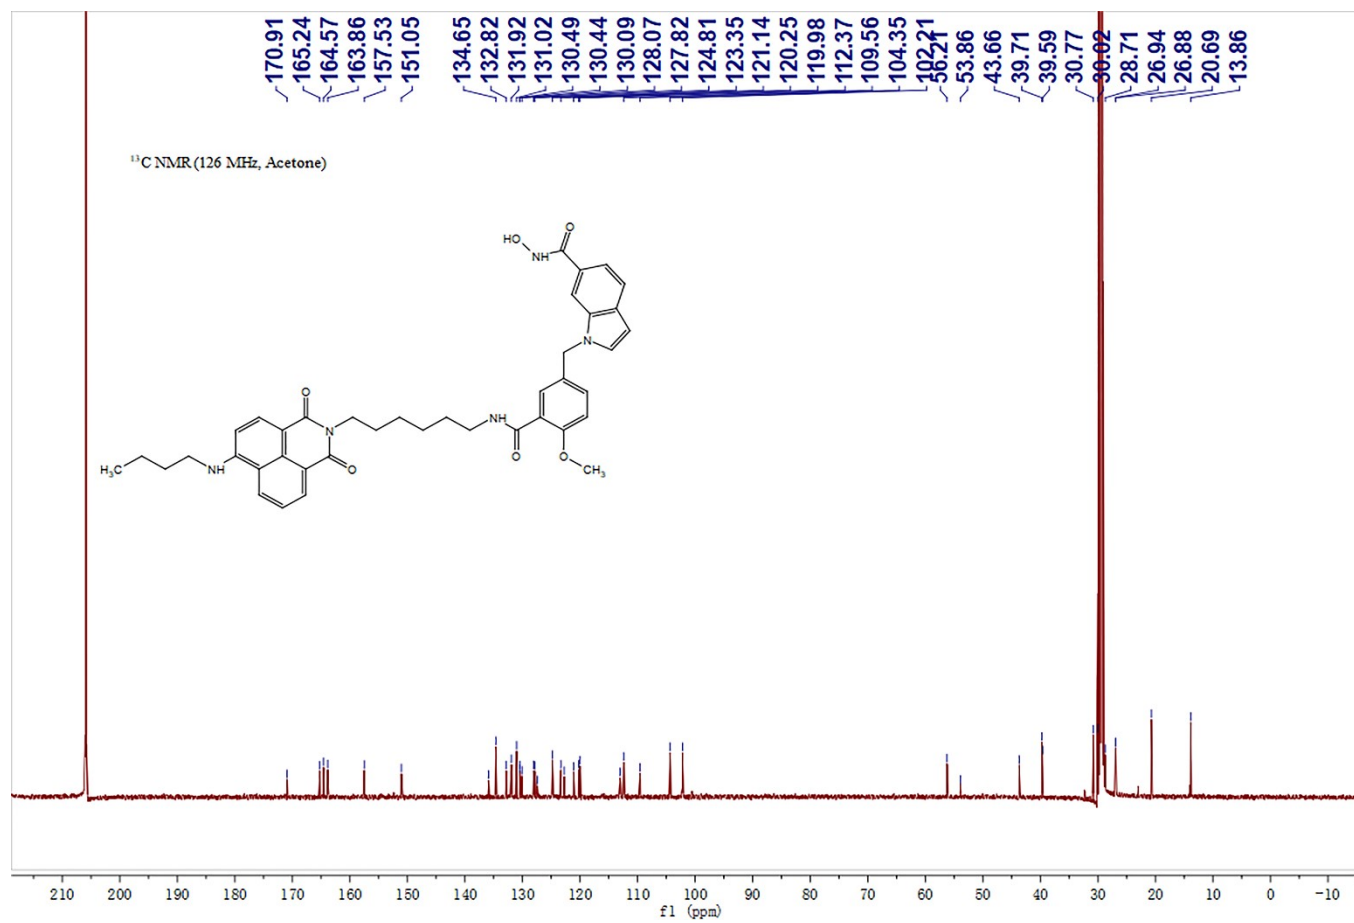

**Figure S25 :** <sup>13</sup>C NMR spectrum of **compound 10 (NP-C6-PCI)** (126 MHz, Acetone-*d*<sub>6</sub>)

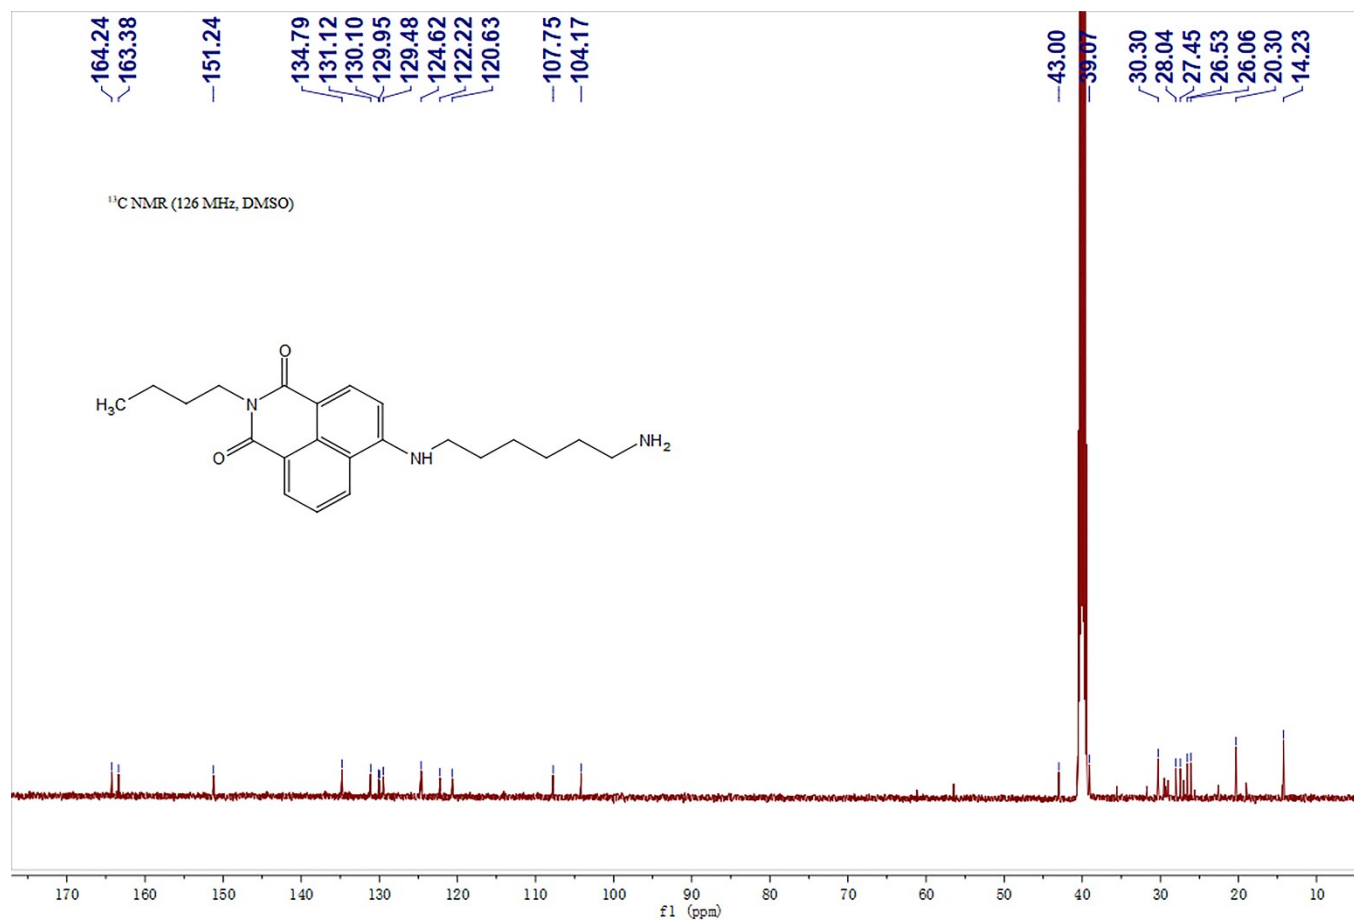

Figure S26 : <sup>13</sup>C NMR spectrum of compound 12 (126 MHz, DMSO-*d*<sub>6</sub>)

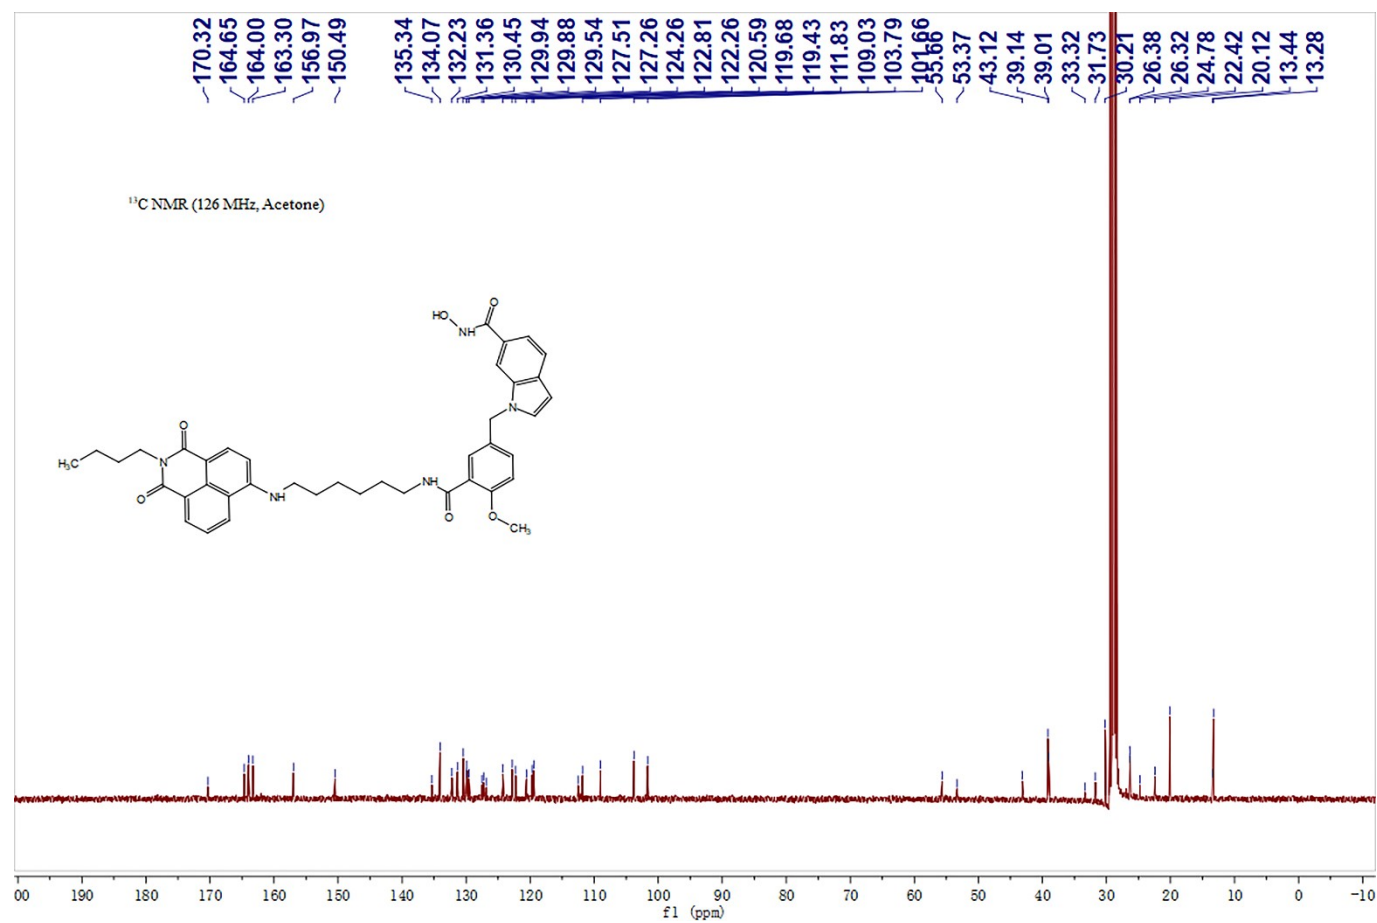

Figure S27 : <sup>13</sup>C NMR spectrum of compound 13 (AM-C6-PCI) (126 MHz, Acetone-*d*<sub>6</sub>)

**Table S1** Antitumor activities of tested compounds on SH-SY5Y cell (inhibition, %).

|        | <b>PCI-34051</b> | <b>NP-C6-PCI</b> | <b>AM-C6-PCI</b> |
|--------|------------------|------------------|------------------|
| 0.25μM | 1.81             | 8.63             | 3.01             |
| 0.5μM  | 0.96             | 9.90             | 2.70             |
| 1.25μM | 6.52             | 13.06            | 3.36             |
| 2.5μM  | 33.65            | 25.83            | 6.12             |
| 5μM    | 73.18            | 73.00            | 11.63            |
| 10μM   | 84.49            | 77.56            | 35.24            |
| 20μM   | 85.71            | 81.56            | 62.10            |

**Table S2** Antitumor activities of tested compounds on MDA-MB-231 cell (inhibition, %).

|        | <b>PCI-34051</b> | <b>NP-C6-PCI</b> | <b>AM-C6-PCI</b> |
|--------|------------------|------------------|------------------|
| 0.25μM | 2.72             | 3.48             | 5.98             |
| 0.5μM  | 1.52             | 1.04             | 3.54             |
| 1.25μM | 12.37            | 10.16            | 5.95             |
| 2.5μM  | 20.65            | 10.52            | 8.16             |
| 5μM    | 18.12            | 14.62            | 15.78            |
| 10μM   | 38.49            | 20.96            | 24.08            |
| 20μM   | 48.87            | 36.04            | 39.22            |
